# Supplementary material for: Mechanical aortic valve replacement in non-elderly adults: meta-analysis and microsimulation
Source: Oxford University Press journal article supplement (doi:10.1093/eurheartj/ehx199), 2017-03-28

## Supplement 1. Literature search query.

### Embase (Embase en Medline): 3181 results

('Aorta valve replacement'/de OR 'Aorta Valve Prosthesis'/exp OR (('Aorta Valve'/de OR 'Aorta Valve Disease'/exp OR ((aortic OR aorta) NEAR/3 (valve OR valvul\* OR stenos\* OR insufficien\* OR regurgitat\* OR incompeten\*)):ab,ti) AND ('Transplantation'/de OR 'Implantation'/exp OR (replac\* OR transplant\* OR implant\* OR artificial):ab,ti)) OR (AVR AND valve):ab,ti) AND ('Mechanical heart valve'/exp OR (mechanical OR mechano\* OR ATS OR 'Bjork Shiley' OR 'Bjoerk Shiley' OR CarboMedic\* OR 'Saint Jude' OR 'St Jude' OR 'St. Jude' OR 'Starr Edwards' OR pyrocarbon OR LTIC OR carbon):ab,ti) AND ('Survival'/exp OR 'Mortality'/exp OR 'Prognosis'/de OR 'Treatment outcome'/exp OR 'Evaluation and follow up'/de OR 'Follow up'/de OR 'Hazard Assessment'/de OR (surviv\* OR mortalit\* OR death\* OR prognos\* OR outcome\* OR 'follow up' OR 'long term' OR hazard\*):ab,ti) NOT ([animals]/lim NOT [humans]/lim)

### Medline (OVID-SP): 2350 results

((("Aortic Valve"/ OR exp "Aortic Valve Stenosis"/ OR "Aortic Valve Insufficiency"/ OR ((aortic OR aorta) ADJ3 (valve OR valvul\* OR stenos\* OR insufficien\* OR regurgitat\* OR incompeten\*)):ab,ti.) AND ("Transplantation"/ OR transplantation.xs. OR "Heart Valve Prosthesis Implantation"/ OR (replac\* OR transplant\* OR implant\* OR artificial).ab,ti.)) OR (AVR AND valve).ab,ti.) AND ("Carbon"/ OR (mechanical OR mechano\* OR ATS OR "Bjork Shiley" OR "Bjoerk Shiley" OR Carbomedic\* OR "Saint Jude" OR "St Jude" OR "St. Jude" OR "Starr Edwards" OR pyrocarbon OR LTIC OR carbon).ab,ti.) AND ("Survival"/ OR exp "Mortality"/ OR mortality.xs. OR "Prognosis"/ OR exp "Treatment outcome"/ OR "Follow-Up Studies"/ OR (surviv\* OR mortalit\* OR death\* OR prognos\* OR outcome\* OR "follow up" OR "long term" OR hazard\*).ab,ti.) NOT (animals NOT humans).sh.

### Cochrane Central: 80 results

(((((aortic OR aorta) NEAR/3 (valve OR valvul\* OR stenos\* OR insufficien\* OR regurgitat\* OR incompeten\*)):ab,ti) AND ((replac\* OR transplant\* OR implant\* OR artificial):ab,ti)) OR (AVR AND valve):ab,ti) AND ((mechanical OR mechano\* OR ATS OR 'Bjork Shiley' OR 'Bjoerk Shiley' OR CarboMedic\* OR 'Saint Jude' OR 'St Jude' OR 'St. Jude' OR 'Starr Edwards' OR pyrocarbon OR LTIC OR carbon):ab,ti) AND ((surviv\* OR mortalit\* OR death\* OR prognos\* OR outcome\* OR 'follow up' OR 'long term' OR hazard\*):ab,ti)

### Web of Science: 1538 results

TS=((((aortic OR aorta) NEAR/2 (valve OR valvul\* OR stenos\* OR insufficien\* OR regurgitat\* OR incompeten\*)) AND (replac\* OR transplant\* OR implant\* OR artificial)) OR (AVR AND valve)) AND ((mechanical OR mechano\* OR ATS OR "Bjork Shiley" OR "Bjoerk Shiley" OR CarboMedic\* OR "Saint Jude" OR "St Jude" OR "St. Jude" OR "Starr Edwards" OR pyrocarbon OR LTIC OR carbon)) AND ((surviv\* OR mortalit\* OR death\* OR prognos\* OR outcome\* OR "follow up" OR "long term" OR hazard\*)) NOT ((animal\* OR rat OR rats OR mouse OR mice OR pigs OR swine OR sheep) NOT (human\* OR people OR patient\*))

**PubMed as supplied by publisher: 36 results**

((((aortic[tiab] OR aorta[tiab]) AND (valve[tiab] OR valvul\*[tiab] OR stenos\*[tiab] OR insufficien\*[tiab] OR regurgitat\*[tiab] OR incompeten\*[tiab])) AND (replac\*[tiab] OR transplant\*[tiab] OR implant\*[tiab] OR artificial[tiab])) OR (AVR[tiab] AND valve[tiab])) AND ((mechanical[tiab] OR mechano\*[tiab] OR ATS[tiab] OR Bjork Shiley\*[tiab] OR CarboMedic\*[tiab] OR Saint Jude\*[tiab] OR St Jude\*[tiab] OR St. Jude\*[tiab] OR Starr Edwards\*[tiab] OR pyrocarbon[tiab] OR LTIC[tiab] OR carbon[tiab])) AND ((surviv\*[tiab] OR mortalit\*[tiab] OR death\*[tiab] OR prognos\*[tiab] OR outcome\*[tiab] OR follow up\*[tiab] OR long term\*[tiab] OR hazard\*[tiab])) NOT ((animal\*[tiab] OR rat[tiab] OR rats[tiab] OR mouse[tiab] OR mice[tiab] OR pigs[tiab] OR swine[tiab] OR sheep[tiab]) NOT (human\*[tiab] OR people[tiab] OR patient[tiab] OR patients[tiab])) AND publisher[sb]

Supplement 2. Study characteristics.

| First author | Year of publication | No. of patients | Inclusion period (y) | Study type    | Mean follow-up (y) | Mean age (y)      | Gender (% male) | Prosthesis model                                                            |
|--------------|---------------------|-----------------|----------------------|---------------|--------------------|-------------------|-----------------|-----------------------------------------------------------------------------|
| Nistal       | 1996                | 209             | 1989-1992            | Retrospective | 2.5                | 54.1              | 74.2            | Carbomedics                                                                 |
| Gaudino      | 1997                | 20              | 1988-1996            | Retrospective | 2.5                | 46.5              | 85.0            | Sorin Bicarbon (n=10)/Carbomedics (n=5)/St. Jude (n=3)                      |
| Katircioglu  | 1997                | 865             | 1986-1996            | Retrospective | 3.3                | 42.9              | -               | St. Jude                                                                    |
| Renzulli     | 1997                | 305             | 1982-1994            | Retrospective | 3.1                | 50.4              | -               | Carbomedics (n=200)/St. Jude (n=82)/Sorin Bicarbon (n=23)                   |
| Natsuaki     | 1998                | 37              | 1985-1997            | Retrospective | 5.3                | 52.0              | 78.4            | St. Jude                                                                    |
| Jamieson     | 1999                | 384             | 1989-1994            | Retrospective | 2.5                | 52.3              | 74.2            | St. Jude/Carbomedics (n=NR)                                                 |
| Chang        | 2001                | 256             | 1988-1997            | Retrospective | 5.3                | 43.9              | -               | St. Jude (n=142)/Carbomedics (n=114)                                        |
| Imanaka      | 2001                | 126             | 1990-1996            | Retrospective | 6.3                | 51.2              | 59.5            | Carbomedics                                                                 |
| Ozeren       | 2001                | 70              | 1998-2000            | Retrospective | 1.3                | 33.8              | -               | ATS                                                                         |
| Kuwaki       | 2002                | 69              | 1990-2000            | Retrospective | 6.5                | 48.9              | 68.1            | Carbomedics                                                                 |
| Aagaard      | 2003                | 55              | 1987-2000            | Retrospective | 7.6 <sup>a</sup>   | 33.0 <sup>a</sup> | 76.4            | Carbomedics                                                                 |
| Emery        | 2003                | 271             | 1977-1997            | Retrospective | 7.2                | 40.0              | 74.2            | St. Jude                                                                    |
| Chang        | 2005                | 179             | 1988-1999            | Retrospective | 7.9                | 44.4              | -               | Carbomedics                                                                 |
| Concha       | 2005                | 62              | 1997-2003            | Prospective   | 2.5                | 37.7              | 75.8            | Carbomedics (n=38)/St. Jude (n=24)                                          |
| Sakamoto     | 2005                | 46              | 1995-2002            | Retrospective | 6.2                | 54.0              | 91.3            | St. Jude                                                                    |
| Kandemir     | 2006                | 174             | 1992-2004            | Retrospective | 6.2                | 47.7              | 77.6            | Carbomedics (n=94)/St. Jude (n=80)                                          |
| Klieverik    | 2006                | 204             | 1991-2001            | Retrospective | 6.2                | 45.0              | 73.0            | St. Jude (n=199)/ATS (n=4)/Björk-Shiley (n=1)                               |
| Kilian       | 2007                | 147             | 1990-1998            | Retrospective | 8.1                | 54.8              | 85.0            | Sorin Bicarbon                                                              |
| Rodrigues    | 2009                | 117             | 1995-2003            | Retrospective | 4.0                | 45.0              | 69.2            | St. Jude                                                                    |
| Torella      | 2010                | 396             | 2001-2005            | RCT           | 5.6 <sup>a</sup>   | 49.7              | 69.2            | Sorin Bicarbon (n=292)/St. Jude (n=92)/Edwards MIRA(n=7)/ Carbomedics (n=5) |
| Doss         | 2011                | 20              | -                    | RCT           | 1.0                | 48.0              | 55.0            | Edwards MIRA                                                                |
| Weber        | 2012                | 103             | 2000-2009            | Prospective   | 2.8                | 50.0              | 84.5            | St. Jude/ATS (n=NR)                                                         |
| Cphoon       | 2013                | 60              | 1994-2000            | Retrospective | 6.6                | 46.0              | 83.3            | St. Jude                                                                    |
| Andreas      | 2014                | 173             | 1991-2008            | Retrospective | 7.9                | 41.0              | 75.1            | Carbomedics/Medtronic Hall/On-X/Edwards/St. Jude (n=NR)                     |
| McClure      | 2014                | 361             | 1992-2011            | Retrospective | 6.0 <sup>a</sup>   | 53.2              | 70.4            | St. Jude (n=318)/On-X (n=23)/Carbomedics (n=19)/Unknown (n=1)               |
| Nazarov      | 2014                | 211             | 2003-2004            | Prospective   | 5.1                | 52.2              | -               | Cardiamed                                                                   |
| Nishida      | 2014                | 220             | 1990-2012            | Retrospective | 12.0               | 54.9              | 72.7            | Carbomedics                                                                 |
| Bouhout      | 2015                | 450             | 1997-2006            | Prospective   | 9.1                | 53.0              | 67.6            | Carbomedics (n=402)/St. Jude (n=35)/Medtronic Advantage (n=13)              |
| Nishida      | 2015                | 157             | 1981-2014            | Retrospective | 11.8               | 50.6              | 49.7            | St. Jude                                                                    |

<sup>a</sup>Median.

-, variable not reported; RCT, randomized controlled trial; NR, not reported.

**Supplement 3.** Pooled early mortality risk and linearized occurrence rates of late outcome events (including individual study estimates).

|                                  | Early mortality (%)                   | Late mortality (%/yr)                 | Cardiac death (%/yr)                  | Valve-related death (%/yr)            | SUD (%/yr)                         | Reintervention (%/yr)              | Thromboembolism (%/yr)                | Valve thrombosis (%/yr)               | Bleeding (%/yr)                       | SVD (%/yr)              | NSVD (%/yr)                           | Endocarditis (%/yr)                 |
|----------------------------------|---------------------------------------|---------------------------------------|---------------------------------------|---------------------------------------|------------------------------------|------------------------------------|---------------------------------------|---------------------------------------|---------------------------------------|-------------------------|---------------------------------------|-------------------------------------|
| Nistal (1996)                    | 5.26(2.96-9.36)                       | 1.53(0.77-3.05)                       | 1.15(0.52-2.55)                       | 0.96(0.40-2.29)                       | 0.57(0.19-1.78)                    | 0.38(0.10-1.53)                    | 3.07(1.89-4.97)                       | 0.10(0.01-1.53)                       | 1.92(1.04-3.54)                       | 0.10(0.01-1.53)         | 0.77(0.29-2.03)                       | 0.10(0.01-1.53)                     |
| Gaudino (1997)                   | 2.50(0.16-38.60)                      | 5.90(1.97-17.69)                      | 5.90(1.97-17.69)                      | 1.97(0.28-13.70)                      | 0.98(0.06-15.51)                   | 1.97(0.28-13.70)                   | -                                     | -                                     | -                                     | -                       | 5.90(1.97-17.69)                      | 1.97(0.28-13.70)                    |
| Katircioglu (1997)               | 5.90(4.52-7.69)                       | 0.71(0.44-1.14)                       | -                                     | -                                     | -                                  | 1.00(0.67-1.49)                    | 1.50(1.08-2.07)                       | 0.71(0.44-1.14)                       | 1.58(1.15-2.17)                       | -                       | 0.12(0.04-0.39)                       | -                                   |
| Renzulli (1997)                  | 8.39(5.72-12.31)                      | 0.79(0.38-1.66)                       | 0.57(0.24-1.36)                       | 0.34(0.11-1.05)                       | 0.23(0.06-0.91)                    | -                                  | 0.23(0.06-0.91)                       | 0.06(0.00-0.91)                       | 0.91(0.46-1.81)                       | 0.06(0.00-0.91)         | -                                     | -                                   |
| Natsuaki (1998)                  | -                                     | 1.02(0.26-4.05)                       | 0.51(0.07-3.60)                       | 0.25(0.02-4.06)                       | -                                  | -                                  | 0.25(0.02-4.06)                       | -                                     | 0.51(0.07-3.60)                       | -                       | 0.25(0.02-4.06)                       | -                                   |
| Jamieson (1999)                  | 2.60(1.41-4.80)                       | 1.75(1.09-2.80)                       | 0.72(0.34-1.51)                       | 0.62(0.28-1.37)                       | 0.10(0.01-0.73)                    | -                                  | 1.13(0.63-2.04)                       | 0.05(0.00-0.82)                       | 1.54(0.93-2.55)                       | -                       | -                                     | -                                   |
| Chang (2001)                     | 4.69(2.70-8.14)                       | 2.06(1.43-2.98)                       | -                                     | -                                     | -                                  | -                                  | -                                     | -                                     | -                                     | 0.04(0.00-0.59)         | -                                     | -                                   |
| Imanaka (2001)                   | 6.35(3.25-12.42)                      | 1.26(0.68-2.34)                       | 0.63(0.26-1.52)                       | 0.51(0.19-1.34)                       | 0.25(0.06-1.01)                    | -                                  | 0.25(0.06-1.01)                       | -                                     | 0.25(0.06-1.01)                       | -                       | 0.13(0.02-0.90)                       | 0.13(0.02-0.90)                     |
| Ozeren (2001)                    | 1.43(0.20-10.00)                      | 0.58(0.04-9.25)                       | -                                     | -                                     | -                                  | 1.17(0.17-8.19)                    | -                                     | 0.58(0.04-9.25)                       | 0.58(0.04-9.25)                       | -                       | 1.17(0.17-8.19)                       | 0.58(0.04-9.25)                     |
| Kuwaki (2002)                    | 5.80(2.24-15.01)                      | 1.11(0.47-2.67)                       | 0.89(0.34-2.37)                       | 0.22(0.03-1.58)                       | 0.22(0.03-1.58)                    | 0.67(0.22-2.07)                    | 1.34(0.60-2.96)                       | 0.22(0.03-1.58)                       | 0.45(0.11-1.78)                       | 0.11(0.01-1.78)         | 1.11(0.47-2.67)                       | 0.22(0.03-1.58)                     |
| Aagard (2003)                    | 0.91(0.06-14.35)                      | 0.99(0.37-2.63)                       | 0.74(0.24-2.29)                       | 0.12(0.01-1.98)                       | 0.12(0.01-1.98)                    | 0.50(0.12-1.97)                    | 0.25(0.03-1.75)                       | 0.12(0.01-1.98)                       | 0.12(0.01-1.98)                       | 0.12(0.01-1.98)         | 0.25(0.03-1.75)                       | 0.25(0.03-1.75)                     |
| Emery (2003)                     | 1.11(0.36-3.41)                       | 0.92(0.58-1.46)                       | -                                     | 0.20(0.08-0.54)                       | -                                  | 0.41(0.20-0.82)                    | 0.31(0.14-0.68)                       | 0.10(0.03-0.41)                       | 0.31(0.14-0.68)                       | 0.03(0.00-0.41)         | 0.31(0.14-0.68)                       | 0.15(0.05-0.47)                     |
| Chang (2005)                     | 1.68(0.55-5.15)                       | 1.34(0.86-2.10)                       | 0.99(0.59-1.67)                       | 0.64(0.33-1.22)                       | 0.14(0.04-0.56)                    | 0.07(0.01-0.50)                    | 1.20(0.75-1.93)                       | 0.07(0.01-0.50)                       | 0.92(0.54-1.58)                       | 0.04(0.00-0.57)         | 0.07(0.01-0.50)                       | 0.42(0.19-0.94)                     |
| Concha (2005)                    | 6.45(2.50-16.65)                      | 0.32(0.02-5.06)                       | 0.32(0.02-5.06)                       | 0.32(0.02-5.06)                       | 0.32(0.02-5.06)                    | 0.64(0.09-4.48)                    | 2.54(0.97-6.69)                       | -                                     | 1.27(0.32-5.04)                       | -                       | -                                     | 1.91(0.62-5.85)                     |
| Sakamoto (2005)                  | 2.17(0.31-15.11)                      | 1.05(0.34-3.24)                       | 0.35(0.05-2.48)                       | 0.35(0.05-2.48)                       | 0.18(0.01-2.80)                    | 0.18(0.01-2.80)                    | 0.81(0.22-2.93)                       | -                                     | 0.18(0.01-2.80)                       | -                       | -                                     | 0.70(0.18-2.79)                     |
| Kandemir (2006)                  | 2.30(0.87-6.06)                       | 1.52(0.93-2.47)                       | 1.33(0.79-2.24)                       | 0.19(0.05-0.76)                       | 0.09(0.01-0.67)                    | -                                  | 0.95(0.51-1.76)                       | 0.09(0.01-0.67)                       | 0.66(0.32-1.39)                       | 0.05(0.00-0.76)         | 0.09(0.01-0.67)                       | -                                   |
| Klieverik (2006)                 | 1.96(0.74-5.17)                       | 1.58(1.02-2.44)                       | 1.10(0.66-1.86)                       | 0.87(0.48-1.56)                       | 0.47(0.21-1.05)                    | 0.79(0.43-1.46)                    | 0.47(0.21-1.05)                       | 0.24(0.08-0.73)                       | 0.87(0.48-1.56)                       | 0.04(0.00-0.63)         | 0.32(0.12-0.84)                       | 0.47(0.21-1.05)                     |
| Kilian (2007)                    | 4.08(1.86-8.94)                       | 3.52(2.61-4.73)                       | -                                     | 1.34(0.82-2.18)                       | -                                  | 0.50(0.23-1.12)                    | 1.34(0.82-2.18)                       | -                                     | 1.51(0.95-2.38)                       | -                       | -                                     | -                                   |
| Rodrigues (2009)                 | 6.84(3.50-13.35)                      | 1.91(1.00-3.65)                       | 1.49(0.71-3.10)                       | 1.27(0.57-2.82)                       | 0.42(0.11-1.69)                    | 0.21(0.03-1.50)                    | 0.42(0.11-1.69)                       | 0.11(0.01-1.69)                       | 2.33(1.30-4.19)                       | 0.11(0.01-1.69)         | -                                     | 0.21(0.03-1.50)                     |
| Torella (2010)                   | -                                     | 0.09(0.02-0.36)                       | 0.09(0.02-0.36)                       | 0.09(0.02-0.36)                       | 0.02(0.00-0.36)                    | -                                  | 0.18(0.07-0.48)                       | -                                     | 0.14(0.04-0.42)                       | -                       | -                                     | -                                   |
| Doss (2011)                      | 2.50(0.16-38.60)                      | 5.00(0.74-33.78)                      | 2.50(0.16-38.60)                      | 2.50(0.16-38.60)                      | 2.50(0.16-38.60)                   | 2.50(0.16-38.60)                   | 2.50(0.16-38.60)                      | 2.50(0.16-38.60)                      | 5.00(0.74-33.78)                      | 2.50(0.16-38.60)        | 2.50(0.16-38.60)                      | 2.50(0.16-38.60)                    |
| Weber (2012)                     | -                                     | 0.71(0.18-2.81)                       | 0.35(0.05-2.50)                       | 0.35(0.05-2.50)                       | 0.18(0.01-2.82)                    | 0.71(0.18-2.81)                    | 2.12(0.96-4.68)                       | -                                     | 0.35(0.05-2.50)                       | -                       | -                                     | 0.71(0.18-2.81)                     |
| Cohoon (2013)                    | -                                     | 1.77(0.85-3.68)                       | -                                     | -                                     | -                                  | -                                  | -                                     | -                                     | -                                     | -                       | -                                     | -                                   |
| Andreas (2014)                   | 1.16(0.29-4.59)                       | 2.05(1.42-2.96)                       | 1.54(1.01-2.35)                       | 1.39(0.89-2.17)                       | 1.02(0.61-1.72)                    | 0.73(0.39-1.36)                    | 1.10(0.66-1.82)                       | 0.07(0.01-0.52)                       | 1.32(0.83-2.08)                       | -                       | -                                     | 0.66(0.34-1.26)                     |
| McClure (2014)                   | 1.39(0.58-3.31)                       | 2.28(1.78-2.92)                       | 0.67(0.42-1.07)                       | 0.19(0.08-0.45)                       | 0.02(0.00-0.30)                    | 0.26(0.12-0.55)                    | 0.41(0.23-0.74)                       | -                                     | 0.75(0.48-1.16)                       | -                       | -                                     | -                                   |
| Nazarov (2014)                   | 3.32(1.60-6.87)                       | 1.94(1.27-2.97)                       | -                                     | -                                     | -                                  | -                                  | 2.13(1.42-3.19)                       | 0.05(0.00-0.74)                       | 0.55(0.25-1.23)                       | 0.05(0.00-0.74)         | 0.18(0.05-0.74)                       | 0.28(0.09-0.86)                     |
| Nishida (2014)                   | 0.91(0.23-3.61)                       | 2.80(2.24-3.51)                       | 2.30(1.79-2.95)                       | 1.00(0.68-1.46)                       | -                                  | 0.23(0.10-0.51)                    | 0.80(0.52-1.22)                       | 0.04(0.01-0.27)                       | 0.65(0.40-1.04)                       | 0.02(0.00-0.30)         | 0.27(0.13-0.56)                       | 0.42(0.23-0.75)                     |
| Bouhout (2015)                   | 1.11(0.46-2.66)                       | 1.41(1.10-1.83)                       | 1.00(0.74-1.36)                       | 0.76(0.53-1.07)                       | 0.49(0.32-0.76)                    | 0.63(0.43-0.93)                    | 1.00(0.74-1.36)                       | 0.07(0.02-0.23)                       | 0.93(0.68-1.27)                       | 0.01(0.00-0.19)         | 0.90(0.65-1.24)                       | 0.24(0.13-0.45)                     |
| Nishida (2015)                   | 1.27(0.32-5.05)                       | 2.50(1.88-3.32)                       | 1.10(0.71-1.69)                       | 0.60(0.33-1.08)                       | -                                  | 0.27(0.11-0.65)                    | 0.86(0.53-1.40)                       | 0.03(0.00-0.43)                       | 0.65(0.37-1.14)                       | 0.03(0.00-0.43)         | 0.16(0.05-0.50)                       | 0.16(0.05-0.50)                     |
| <b>Pooled</b>                    | <b>3.15(2.37-4.21)</b>                | <b>1.55(1.25-1.92)</b>                | <b>0.95(0.71-1.27)</b>                | <b>0.60(0.44-0.81)</b>                | <b>0.37(0.26-0.54)</b>             | <b>0.51(0.37-0.71)</b>             | <b>0.90(0.68-1.21)</b>                | <b>0.14(0.08-0.25)</b>                | <b>0.85(0.65-1.12)</b>                | <b>0.00<sup>a</sup></b> | <b>0.39(0.21-0.76)</b>                | <b>0.41(0.29-0.57)</b>              |
| <i>Heterogeneity<sup>b</sup></i> | <i>I<sup>2</sup>=70% (p&lt;0.001)</i> | <i>I<sup>2</sup>=83% (p&lt;0.001)</i> | <i>I<sup>2</sup>=70% (p&lt;0.001)</i> | <i>I<sup>2</sup>=64% (p&lt;0.001)</i> | <i>I<sup>2</sup>=47% (p=0.011)</i> | <i>I<sup>2</sup>=47% (p=0.011)</i> | <i>I<sup>2</sup>=79% (p&lt;0.001)</i> | <i>I<sup>2</sup>=62% (p&lt;0.001)</i> | <i>I<sup>2</sup>=67% (p&lt;0.001)</i> | -                       | <i>I<sup>2</sup>=83% (p&lt;0.001)</i> | <i>I<sup>2</sup>=34% (p=0.0721)</i> |

Pooled estimates presented as “percentage (95% confidence interval)”.

-, variable not reported; Yr, year; SUD, sudden, unexplained death; SVD, structural valve deterioration; NSVD, nonstructural valve dysfunction.

In case a particular event was reported not to occur in an individual study, then for the purpose of the analyses it was assumed that 0.5 patient experienced that event.

<sup>a</sup>There were zero events of SVD in the 15 studies that reported this outcome.

<sup>b</sup>The reported p-values are the p-values of Cochran’s Q test for heterogeneity.

**Supplement 4.** Random effects meta-regression of natural log-transformed outcome measures.

| <b>Covariate</b>              | <b><math>\beta</math></b> | <b>95%CI-</b> | <b>95%CI+</b> | <b>SE</b>    | <b>p-value</b>   |
|-------------------------------|---------------------------|---------------|---------------|--------------|------------------|
| <i>Early mortality</i>        |                           |               |               |              |                  |
| Year of first inclusion       | -0.007                    | -0.058        | 0.045         | 0.026        | 0.796            |
| <b>Mean FUP (per year)</b>    | <b>-0.172</b>             | <b>-0.261</b> | <b>-0.082</b> | <b>0.046</b> | <b>&lt;0.001</b> |
| <b>Concomitant Procedures</b> | <b>2.479</b>              | <b>0.057</b>  | <b>4.902</b>  | <b>1.236</b> | <b>0.045</b>     |
| Concomitant CABG              | 3.855                     | -1.350        | 9.060         | 2.656        | 0.147            |
| AS                            | -1.565                    | -3.416        | 0.286         | 0.945        | 0.098            |
| AR                            | 1.250                     | -1.057        | 3.557         | 1.177        | 0.288            |
| Rheumatic                     | 1.250                     | -0.059        | 2.560         | 0.668        | 0.061            |
| Mean age (per year)           | -0.006                    | -0.061        | 0.049         | 0.028        | 0.829            |
| Endocarditis                  | 0.306                     | -2.544        | 3.156         | 1.454        | 0.834            |
| Emergency                     | 1.542                     | -6.225        | 9.310         | 3.963        | 0.697            |
| Prospective/RCT study design  | -0.157                    | -0.964        | 0.651         | 0.412        | 0.704            |
| Previous cardiac intervention | 0.655                     | -4.494        | 5.804         | 2.627        | 0.803            |
| <i>Late Mortality</i>         |                           |               |               |              |                  |
| Year of first inclusion       | -0.002                    | -0.036        | 0.032         | 0.017        | 0.911            |
| Mean FUP (per year)           | 0.063                     | 0.000         | 0.126         | 0.032        | 0.052            |
| Concomitant Procedures        | -0.154                    | -1.911        | 1.602         | 0.896        | 0.863            |
| Concomitant CABG              | 0.293                     | -3.462        | 4.047         | 1.916        | 0.879            |
| AS                            | 0.989                     | -0.73         | 2.708         | 0.877        | 0.260            |
| AR                            | -1.502                    | -3.377        | 0.373         | 0.956        | 0.116            |
| Rheumatic                     | -0.552                    | -1.317        | 0.214         | 0.391        | 0.158            |
| Mean age (per year)           | 0.035                     | -0.001        | 0.071         | 0.018        | 0.054            |
| <b>Endocarditis</b>           | <b>1.650</b>              | <b>0.426</b>  | <b>2.874</b>  | <b>0.624</b> | <b>0.008</b>     |
| Emergency                     | 2.699                     | -0.290        | 5.687         | 1.525        | 0.077            |
| Prospective/RCT study design  | -0.314                    | -0.821        | 0.193         | 0.259        | 0.225            |
| Previous cardiac intervention | 1.368                     | -0.991        | 3.727         | 1.204        | 0.256            |
| <i>Reintervention</i>         |                           |               |               |              |                  |
| Year of first inclusion       | 0.018                     | -0.030        | 0.067         | 0.025        | 0.464            |
| <b>Mean FUP (per year)</b>    | <b>-0.107</b>             | <b>-0.189</b> | <b>-0.026</b> | <b>0.042</b> | <b>0.010</b>     |
| Concomitant Procedures        | 0.739                     | -1.542        | 3.020         | 1.164        | 0.526            |
| Concomitant CABG              | 2.908                     | -1.772        | 7.588         | 2.388        | 0.223            |
| AS                            | 0.132                     | -1.087        | 1.352         | 0.622        | 0.831            |
| AR                            | 0.129                     | -1.637        | 1.895         | 0.901        | 0.886            |
| Rheumatic                     | 0.665                     | -0.038        | 1.369         | 0.359        | 0.064            |

|                               |               |                |               |              |                  |
|-------------------------------|---------------|----------------|---------------|--------------|------------------|
| Mean age (per year)           | -0.042        | -0.087         | 0.003         | 0.023        | 0.069            |
| Endocarditis                  | 0.635         | -1.386         | 2.657         | 1.031        | 0.538            |
| Emergency                     | 2.666         | -2.277         | 7.608         | 2.522        | 0.290            |
| Prospective/RCT study design  | 0.368         | -0.359         | 1.094         | 0.371        | 0.321            |
| Previous cardiac intervention | -0.111        | -3.504         | 3.281         | 1.731        | 0.949            |
| <i><u>TE/VT</u></i>           |               |                |               |              |                  |
| Year of first inclusion       | 0.023         | -0.023         | 0.069         | 0.023        | 0.321            |
| Mean FUP (per year)           | -0.062        | -0.158         | 0.034         | 0.049        | 0.203            |
| Concomitant Procedures        | 1.342         | -0.669         | 3.353         | 1.026        | 0.191            |
| Concomitant CABG              | 2.949         | -1.601         | 7.499         | 2.321        | 0.204            |
| AS                            | 0.920         | -1.046         | 2.886         | 1.003        | 0.359            |
| AR                            | 0.576         | -1.513         | 2.665         | 1.066        | 0.589            |
| Rheumatic                     | 0.622         | -0.950         | 2.195         | 0.802        | 0.438            |
| Mean age (per year)           | -0.004        | -0.060         | 0.052         | 0.029        | 0.892            |
| Endocarditis                  | -0.754        | -6.126         | 4.619         | 2.741        | 0.783            |
| Emergency                     | 1.922         | -5.606         | 9.449         | 3.841        | 0.617            |
| Prospective/RCT study design  | 0.368         | -0.307         | 1.044         | 0.345        | 0.286            |
| Previous cardiac intervention | 0.994         | -3.053         | 5.042         | 2.065        | 0.630            |
| <i><u>Bleeding</u></i>        |               |                |               |              |                  |
| Year of first inclusion       | 0.000         | -0.042         | 0.041         | 0.021        | 0.991            |
| <b>Mean FUP (per year)</b>    | <b>-0.077</b> | <b>-0.151</b>  | <b>-0.003</b> | <b>0.038</b> | <b>0.042</b>     |
| Concomitant Procedures        | 1.150         | -0.092         | 2.391         | 0.633        | 0.070            |
| Concomitant CABG              | 3.157         | -0.696         | 7.011         | 1.966        | 0.108            |
| <b>AS</b>                     | <b>2.235</b>  | <b>0.263</b>   | <b>4.206</b>  | <b>1.006</b> | <b>0.026</b>     |
| <b>AR</b>                     | <b>-3.083</b> | <b>-5.150</b>  | <b>-1.016</b> | <b>1.054</b> | <b>0.003</b>     |
| Rheumatic                     | 0.690         | -0.633         | 2.014         | 0.675        | 0.307            |
| Mean age (per year)           | -0.008        | -0.057         | 0.040         | 0.025        | 0.742            |
| Endocarditis                  | 0.324         | -4.003         | 4.652         | 2.208        | 0.883            |
| Emergency                     | -1.907        | -11.833        | 8.019         | 5.064        | 0.707            |
| Prospective/RCT study design  | -0.338        | -0.952         | 0.277         | 0.313        | 0.281            |
| Previous cardiac intervention | 0.343         | -3.076         | 3.761         | 1.744        | 0.844            |
| <i><u>NSVD</u></i>            |               |                |               |              |                  |
| Year of first inclusion       | 0.037         | -0.049         | 0.123         | 0.044        | 0.401            |
| Mean FUP (per year)           | -0.146        | -0.309         | 0.016         | 0.083        | 0.078            |
| Concomitant Procedures        | 1.619         | -4.787         | 8.026         | 3.269        | 0.620            |
| <b>Concomitant CABG</b>       | <b>-7.148</b> | <b>-14.176</b> | <b>-0.119</b> | <b>3.586</b> | <b>0.046</b>     |
| <b>AS</b>                     | <b>3.128</b>  | <b>1.306</b>   | <b>4.949</b>  | <b>0.929</b> | <b>&lt;0.001</b> |

|                               |               |               |               |              |                  |
|-------------------------------|---------------|---------------|---------------|--------------|------------------|
| <b>AR</b>                     | <b>-3.770</b> | <b>-5.945</b> | <b>-1.595</b> | <b>1.110</b> | <b>&lt;0.001</b> |
| <b>Rheumatic</b>              | <b>-3.296</b> | <b>-5.537</b> | <b>-1.055</b> | <b>1.143</b> | <b>0.004</b>     |
| Mean age (per year)           | -0.002        | -0.108        | 0.104         | 0.054        | 0.970            |
| <b>Endocarditis</b>           | <b>2.718</b>  | <b>0.978</b>  | <b>4.458</b>  | <b>0.888</b> | <b>0.002</b>     |
| <b>Emergency</b>              | <b>6.612</b>  | <b>1.778</b>  | <b>11.445</b> | <b>2.466</b> | <b>0.007</b>     |
| Prospective/RCT study design  | 0.523         | -0.922        | 1.968         | 0.737        | 0.478            |
| Previous cardiac intervention | 0.367         | -6.177        | 6.911         | 3.339        | 0.913            |

SE, standard error; 95%CI-, 95% confidence interval lower bound; 95%CI+, 95% confidence interval upper bound; FUP, follow-up; CABG, coronary artery bypass grafting; AS, aortic stenosis; AR, aortic regurgitation; RCT, randomized controlled trial; TE, thromboembolism; VT, valve thrombosis; NSVD, nonstructural valve dysfunction

## **Supplement 5. Methods.**

### **List of recorded variables**

#### Study characteristics:

- Study design
- Number of patients included
- Inclusion period
- Total follow-up

#### Baseline patient and operative characteristics:

- Mean age
- Gender
- Etiology
- Aortic valve hemodynamics
- Aortic valve morphology
- Previous cardiac interventions (any previous surgical or percutaneous intervention on the heart, thoracic aorta and/or pulmonary trunk)
- Urgency of the operation
- Type of mechanical valve (bileaflet, caged-ball or tilting disc)
  - Prosthesis model
- Concomitant procedures

#### Outcome events

- Early outcome events (<30 days after surgery)
  - Early mortality (all-cause mortality within the first 30 postoperative days)
  - Re-exploration for bleeding
  - Pacemaker implantation
  - Deep sternal infection/mediastinitis
  - Endocarditis
  - Stroke
  - Transient ischemic attack
  - Myocardial infarction
  - Valve thrombosis
  - Peripheral bleeding



- Late outcome events (>30 days after surgery)
  - Late mortality
    - Cardiac death
    - Valve related death
    - Sudden, unexplained death (SUD)
  - Reintervention
  - Thromboembolism
  - Valve thrombosis
  - Bleeding
  - Endocarditis
  - Structural valve deterioration (SVD)
  - Nonstructural valve dysfunction (NSVD)

### **Statistical software used**

Statistical analyses were performed in Microsoft Office Excel 2011 (Microsoft Corp., Redmond, WA, USA), IBM SPSS Statistics (version 21.0.0.1. IBM Corp., Armonk, NY, USA) and in the R statistical software (version 3.1.0. R Development Core Team, R Foundation for Statistical Computing, Vienna, Austria) using the metafor package.

**Supplement 6.** References of studies included in the meta-analysis.<sup>14,25,29-55</sup>

14. Torella M, Torella D, Chiodini P, Franciulli M, Romano G, De Santo L, De Feo M, Amarelli C, Sasso FC, Salvatore T, Ellison GM, Indolfi C, Cotrufo M, Nappi G. LOWERing the INTensity of oral anticoagulant Therapy in patients with bileaflet mechanical aortic valve replacement: Results from the "IOWERING-IT" Trial. *Am Heart J* 2010;**160**(1):171-178.
25. Klieverik LMA, Noorlander M, Takkenberg JJM, Kappentein AP, Bekkers JA, Herwerden LAV, Bogers AJJ. Outcome after aortic valve replacement in young adults: Is patient profile more important than prosthesis type? *J Heart Valve Dis* 2006;**15**(4):479-487.
29. Aagaard J, Tingleff J, Andersen PV, Hansen CN. Fourteen years' experience with the CarboMedics valve in young adults with aortic valve disease. *J Heart Valve Dis* 2003;**12**(1):81-86.
30. Andreas M, Wiedemann D, Seebacher G, Rath C, Aref T, Rosenhek R, Heinze G, Eigenbauer E, Simon P, Ruetzler K, Hiesmayr JM, Moritz A, Laufer G, Kocher A. The Ross procedure offers excellent survival compared with mechanical aortic valve replacement in a real-world setting. *Eur J Cardiothorac Surg* 2014.
31. Bouhout I, Stevens LM, Mazine A, Poirier N, Cartier R, Demers P, El-Hamamsy I. Long-term outcomes after elective isolated mechanical aortic valve replacement in young adults. *J Thorac Cardiovasc Surg* 2014;**148**(4):1341-1346.e1341.
32. Chang BC, Lim SH, Kim DK, Seo JY, Cho SY, Shim WH, Chung N, Kim SS, Cho BK. Long-term results with St. Jude Medical and CarboMedics prosthetic heart valves. *J Heart Valve Dis* 2001;**10**(2):185-195.
33. Chang HK, Ahn H, Kyung HK, Kim KB. Long-term result of 1144 CarboMedics mechanical valve implantations. *Ann Thorac Surg* 2005;**79**(6):1939-1944.
34. Cohoon KP, Foley J, Dieter RS, Bakhos M, Schwartz J. The development of ascending aortic aneurysms after elective aortic valve replacement with St Jude mechanical valve prosthesis in the bicuspid patient: A pilot study. *Angiology* 2013;**64**(5):379-384.
35. Concha M, Aranda PJ, Casares J, Merino C, Alados P, Munoz I, Villalba R, Ariza J. Prospective evaluation of aortic valve replacement in young adults and middle-aged patients: Mechanical prosthesis versus pulmonary autograft. *J Heart Valve Dis* 2005;**14**(1):40-46.
36. Doss M, Wood JP, Kiessling AH, Moritz A. Comparative evaluation of left ventricular mass regression after aortic valve replacement: a prospective randomized analysis. *J Cardiothorac Surg* 2011;**6**:136.
37. Emery RW, Erickson CA, Arom KV, Northrup Iii WF, Kersten TE, Von Rueden TJ, Lillehei TJ, Nicoloff DM. Replacement of the aortic valve in patients under 50 years of age: Long-term follow-up of the St. Jude Medical prosthesis. *Ann Thorac Surg* 2003;**75**(6):1815-1819.
38. Gaudino M, De Filippo C, Pennestri F, Possati G. The use of mechanical prostheses in native aortic valve endocarditis. *J HEART VALVE DIS* 1997;**6**(1):79-83.
39. Imanaka K, Takamoto S, Furuse A. Favorable results in patients with small size CarboMedics heart valves in the aortic position. *Ann Thorac Cardiovasc Surg* 2001;**7**(3):150-154.
40. Jamieson WRE, Miyagishima RT, Grunkemeier GL, Germann E, Henderson C, Lichtenstein SV, Ling H, Munro AI. Bileaflet mechanical prostheses for aortic valve replacement

- in patients younger than 65 years and 65 years of age or older: Major thromboembolic and hemorrhagic complications. *Can J Surg* 1999;**42**(1):27-36.
41. Kandemir O, Tokmakoglu H, Yildiz U, Tezcaner T, Yorgancioglu AC, Gunay I, Suzer K, Zorlutuna Y. St. jude medical and carboMedics mechanical heart valves in the aortic position comparison of long-term results. *Texas Heart Institute Journal* 2006;**33**(2):154-159.
  42. Katircioglu SF, Yamak B, Ulus AT, Iscan HZ, Mavitas B, Tasdemir O. Aortic valve replacement with the St. Juode Medical prosthesis and fixed dose anticoagulation. *J Card Surg* 1997;**12**(6):363-371.
  43. Kilian E, Oberhoffer M, Kaczmarek I, Bauerfeind D, Kreuzer E, Reichart B. Outcome after aortic valve replacement: Comparison of homografts with mechanical prostheses. *J Heart Valve Dis* 2007;**16**(4):404-409.
  44. Kuwaki K, Tsukamoto M, Komatsu K, Sakata J, Abe T. Ten year clinical experience with the CarboMedics heart valve implants. *Artif Organs* 2002;**26**(8):695-702.
  45. McClure RS, McGurk S, Cevasco M, Maloney A, Gosev I, Wiegerinck EM, Salvio G, Tokmaji G, Borstlap W, Nauta F, Cohn LH. Late outcomes comparison of nonelderly patients with stented bioprosthetic and mechanical valves in the aortic position: A propensity-matched analysis. *J Thorac Cardiovasc Surg* 2014;**148**(5):1931-1939.
  46. Natsuaki M, Itoh T, Okazaki Y, Ohtubo S, Rikitake K, Naitoh K. Systemic hypertension as a risk factor for complications with an aortic mechanical valve. *ASAIO J* 1998;**44**(5):M486-M490.
  47. Nazarov VM, Zheleznev SI, Bogachev-Prokophiev AV, Afanasyev AV, Nemchenko EV, Jeltovskiy YV, Lavinyukov SO. CardiaMed mechanical valve: Mid-term results of a multicenter clinical trial. *Asian Cardiovasc Thorac Ann* 2014;**22**(1):9-17.
  48. Nishida T, Sonoda H, Oishi Y, Tanoue Y, Nakashima A, Shiokawa Y, Tominaga R. Single-institution, 22-year follow-up of 786 CarboMedics mechanical valves used for both primary surgery and reoperation. *J Thorac Cardiovasc Surg* 2014;**147**(5):1493-1498.
  49. Nishida T, Sonoda H, Oishi Y, Tanoue Y, Tatewaki H, Shiokawa Y, Tominaga R. Long-term comparison of three types of aortic St. Jude medical mechanical prosthesis in Japanese patients. *Circ J* 2015;**79**(10):2193-2200.
  50. Nistal JF, Hurle A, Revuelta JM, Gandarillas M. Clinical experience with the carbomedics valve: Early results with a new bileaflet mechanical prosthesis. *J THORAC CARDIOVASC SURG* 1996;**112**(1):59-68.
  51. Ozeren M, Dogan OV, Dolgun A, Kocyldirim E, Karapinar K, Yucel E. Clinical results of the ATS prosthetic valve in 240 implants and review of the literature. *J Heart Valve Dis* 2001;**10**(5):628-635.
  52. Renzulli A, Ismeno G, Bellitti R, Casale D, Festa M, Nappi GA, Cotrufo M. Long-term results of heart valve replacement with bileaflet prostheses. *J CARDIOVASC SURG* 1997;**38**(3):241-247.
  53. Rodrigues AJ, Evora PRB, Bassetto S, Alves Jr L, Scorzoni Filho A, Vicente WVA. Isolated mitral and aortic valve replacement with the St. Jude Medical valve: A midterm follow-up. *Arq Bras Cardiol* 2009;**93**(3):268-276+282-290+290-298.
  54. Sakamoto Y, Hashimoto K, Okuyama H, Ishii S, Inoue T, Kinouchi K, Abe T. Carpentier-Edwards pericardial aortic valve in middle-aged patients: Comparison with the St. Jude Medical valve. *Jpn J Thorac Cardiovasc Surg* 2005;**53**(9):465-469.

55. Weber A, Nouredine H, Englberger L, Dick F, Gahl B, Aymard T, Czerny M, Tevaearai H, Stalder M, Carrel TP. Ten-year comparison of pericardial tissue valves versus mechanical prostheses for aortic valve replacement in patients younger than 60 years of age. *J Thorac Cardiovasc Surg* 2012;**144**(5):1075-1083.

## Supplement 7. Microsimulation model calibration plot.

The actuarial survival curve obtained from the microsimulation model run for 10,000 iterations at the pooled mean age (48 years) and male/female ratio (72.0% male) of the included studies compared to the pooled overall mortality observed in our meta-analysis.

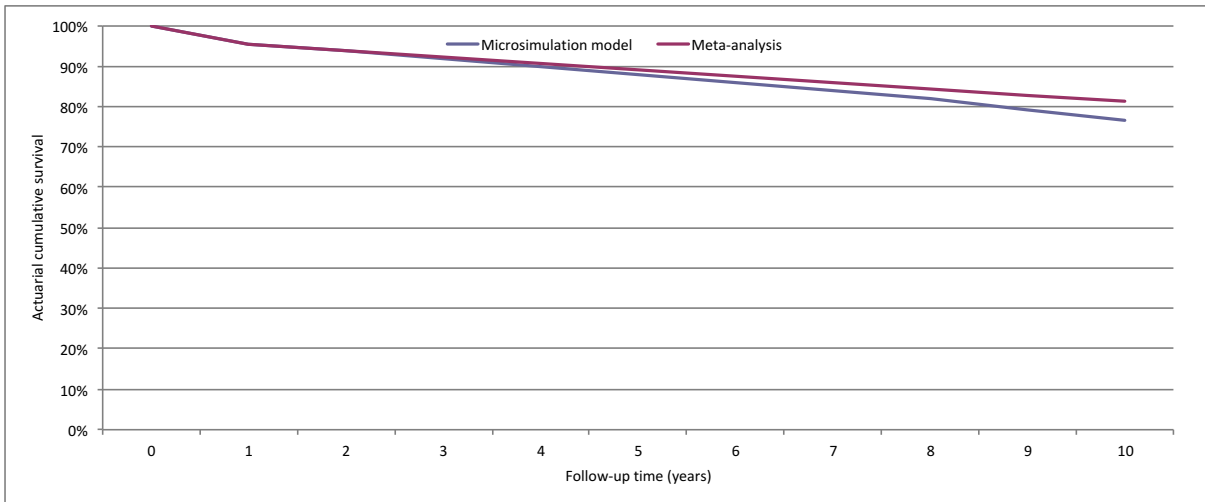

## Supplement 8. Funnel plots.

Funnel plots on a natural log x-axis. SE, standard error; SVD, structural valve deterioration; NSVD, nonstructural valve dysfunction.

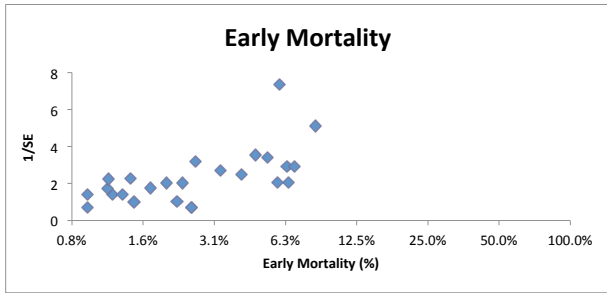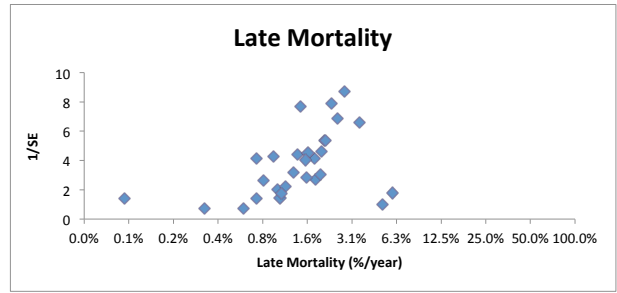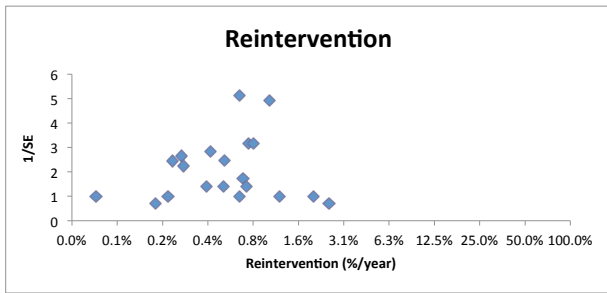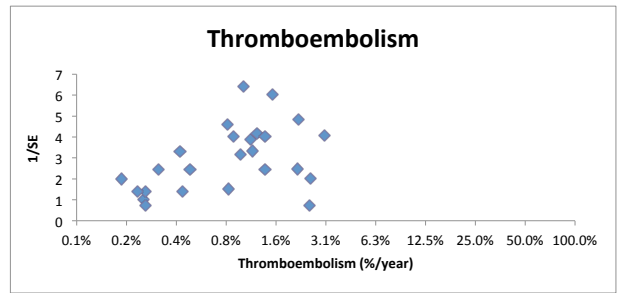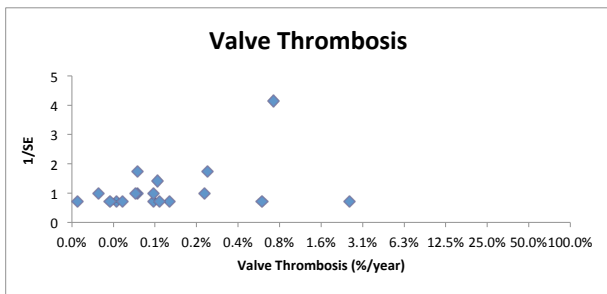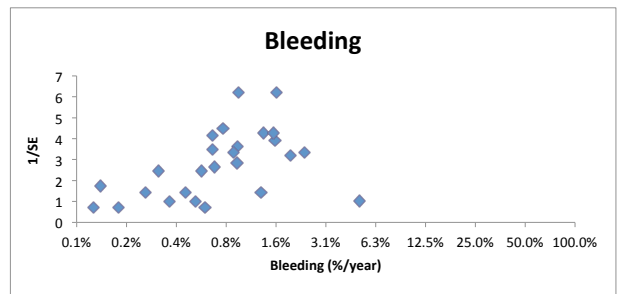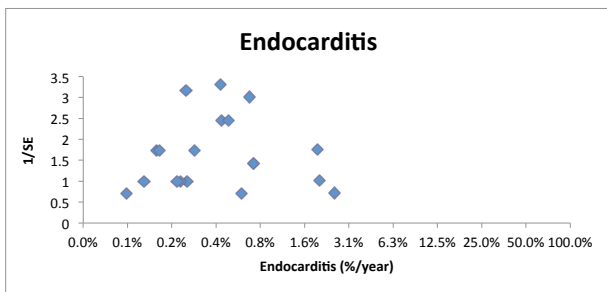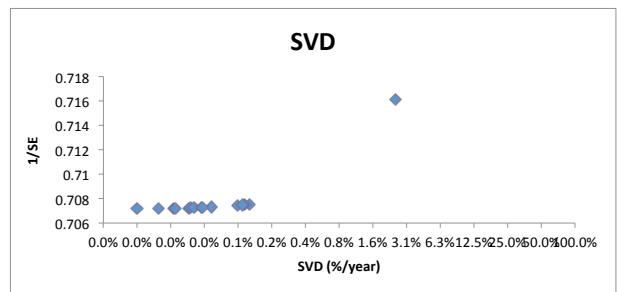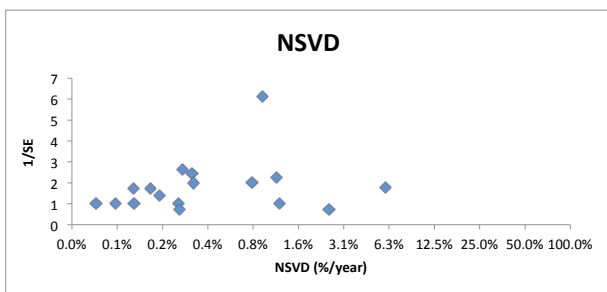

Supplement: eurheartj_38_45_3370_s3.pdf [file eurheartj_38_45_3370_s3.pdf]
